# Supplementary material
Source: MDPI journal article supplement (https://www.mdpi.com/2227-7390/9/11/1247)

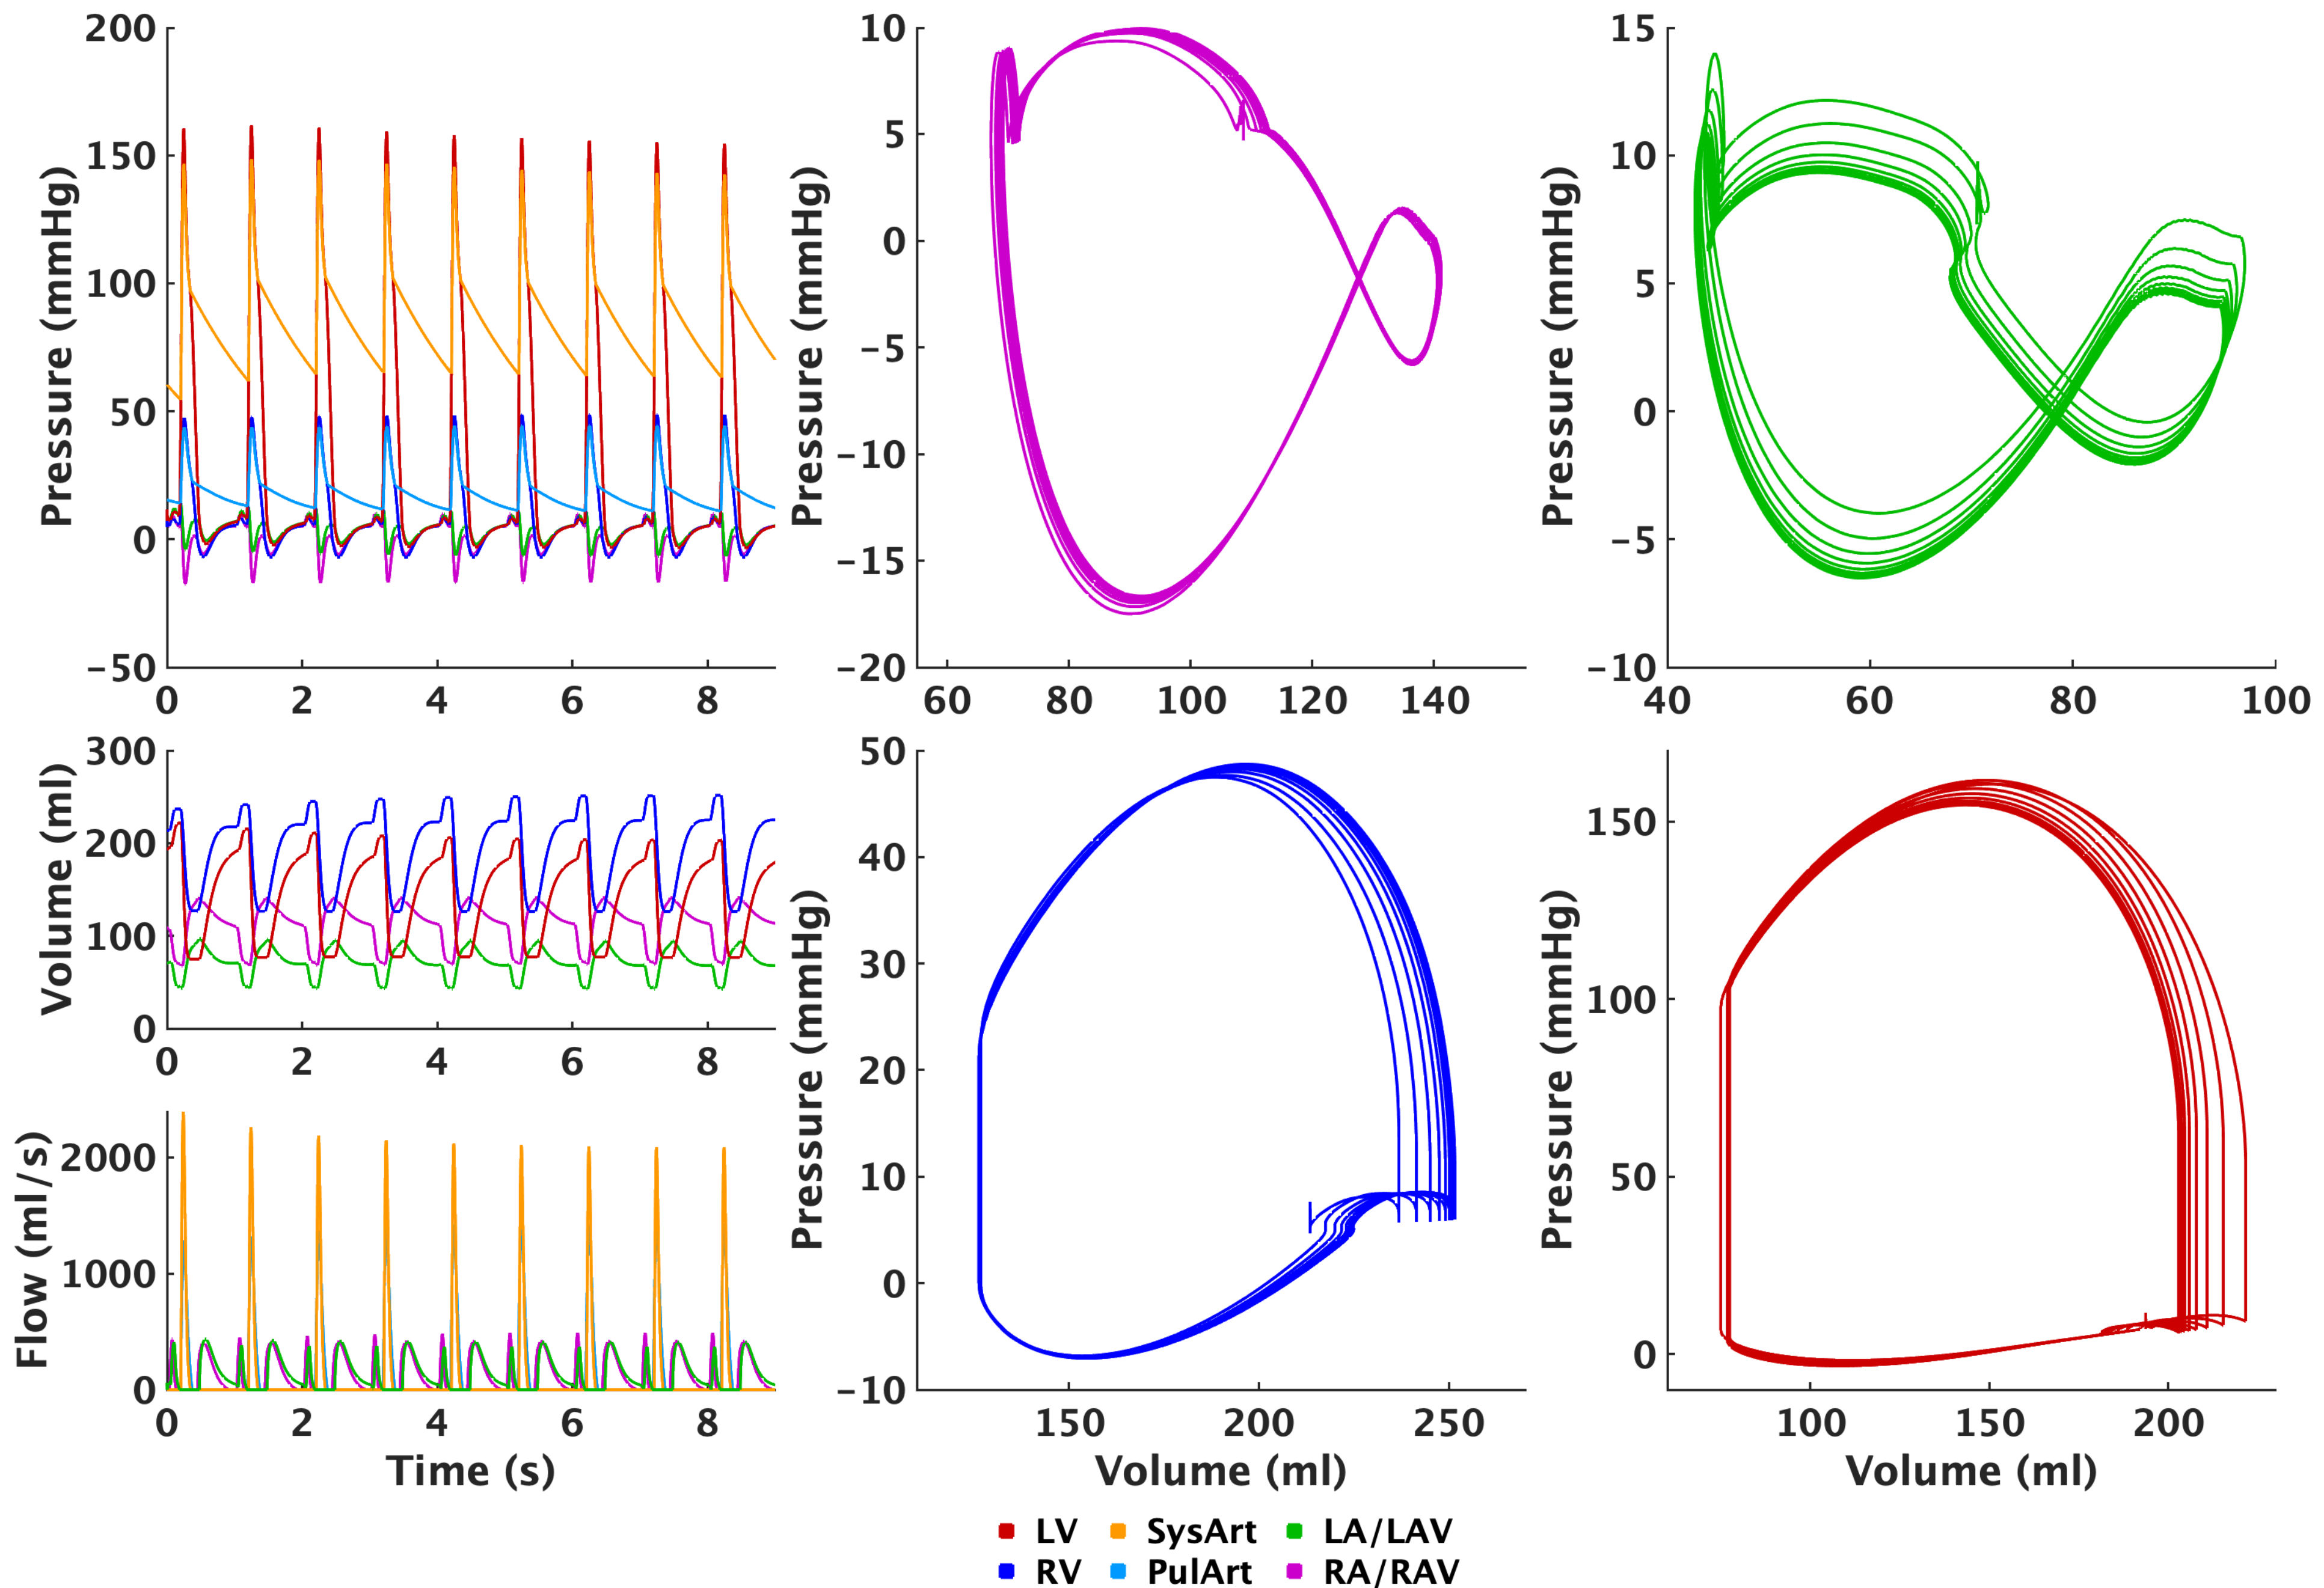

Supplement: s1 [file s1]

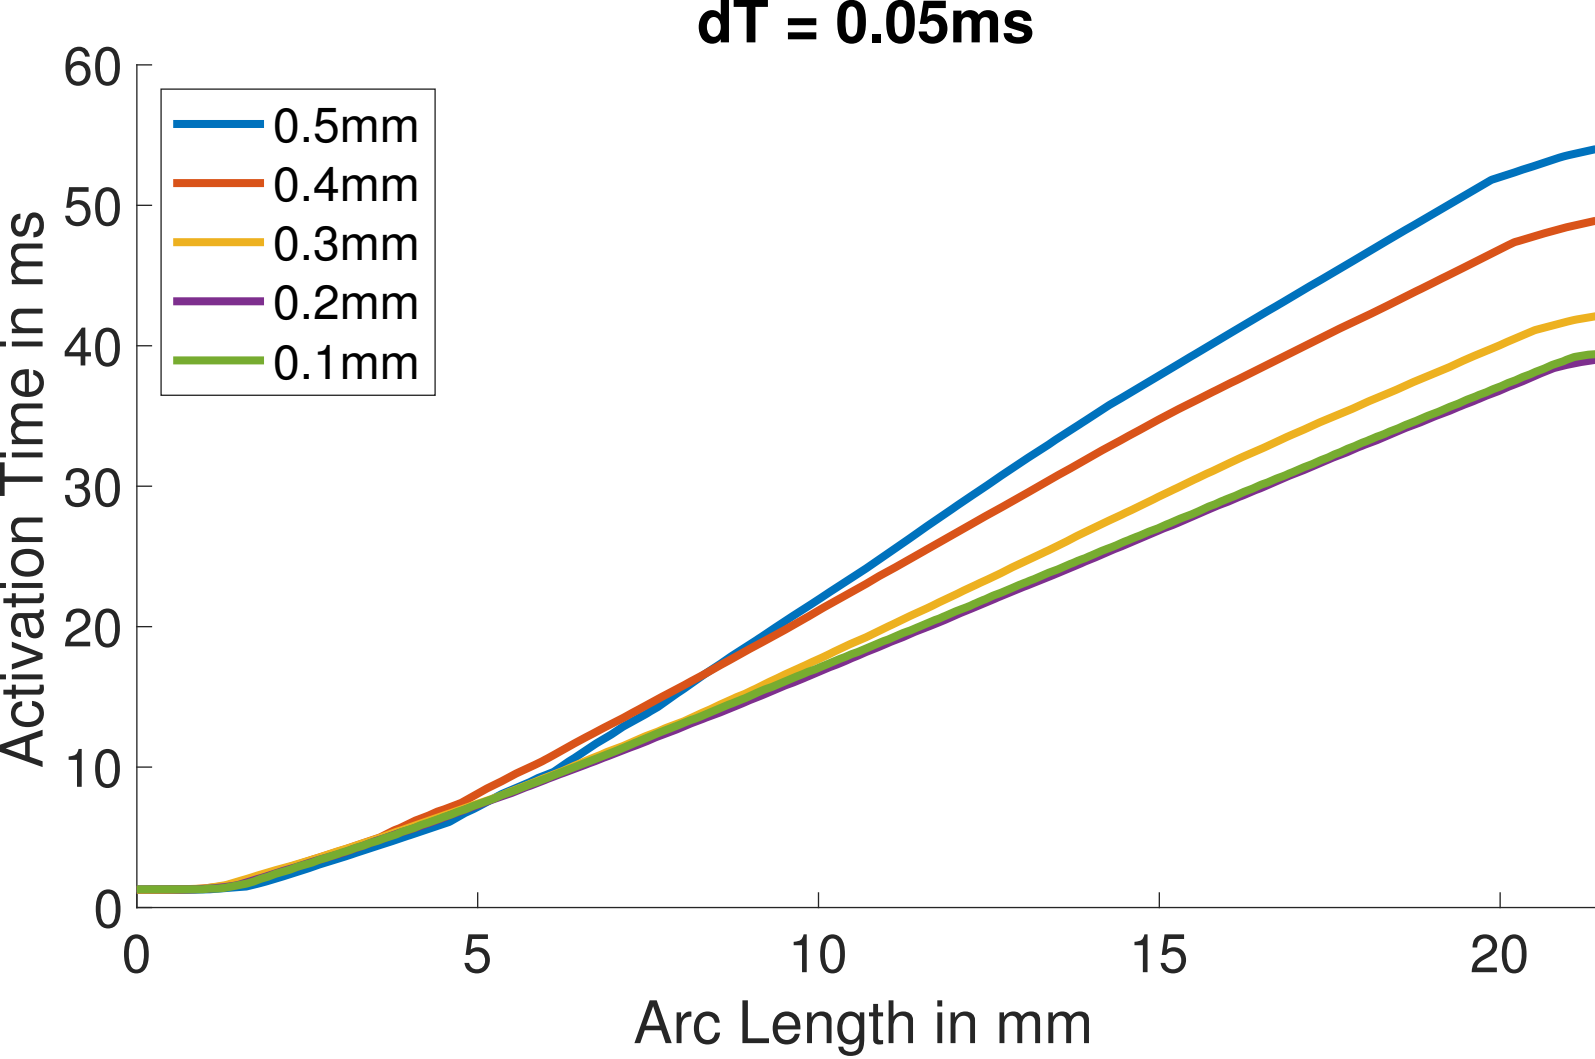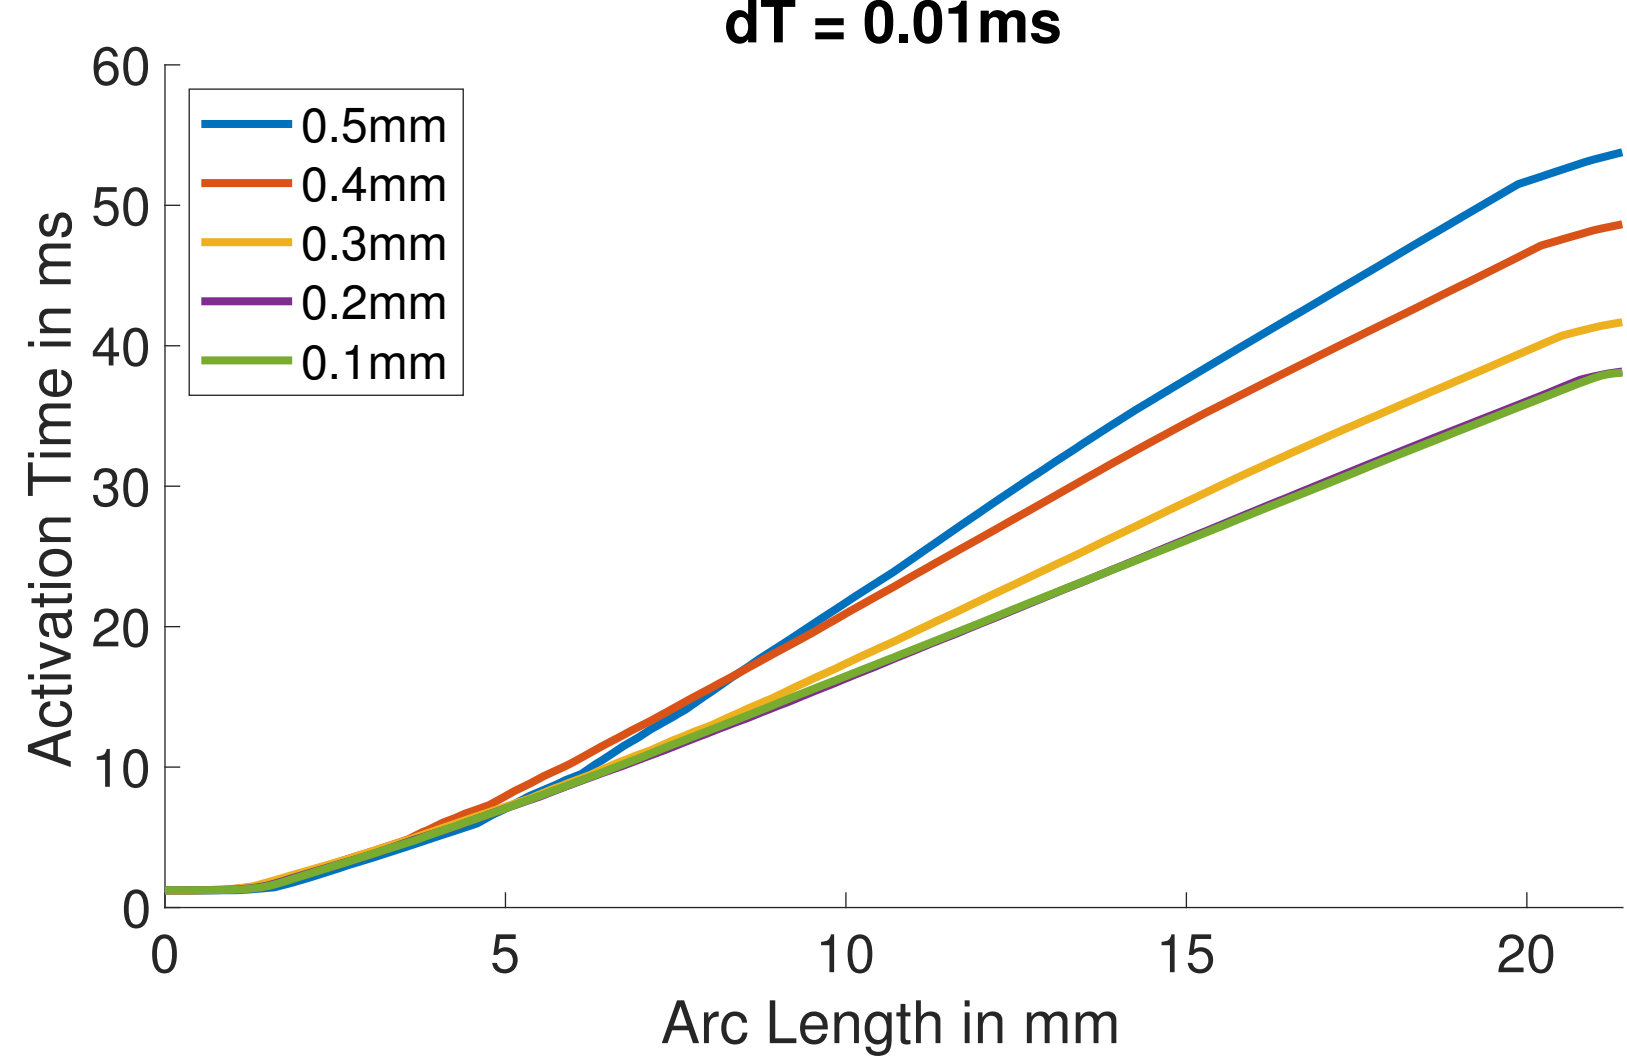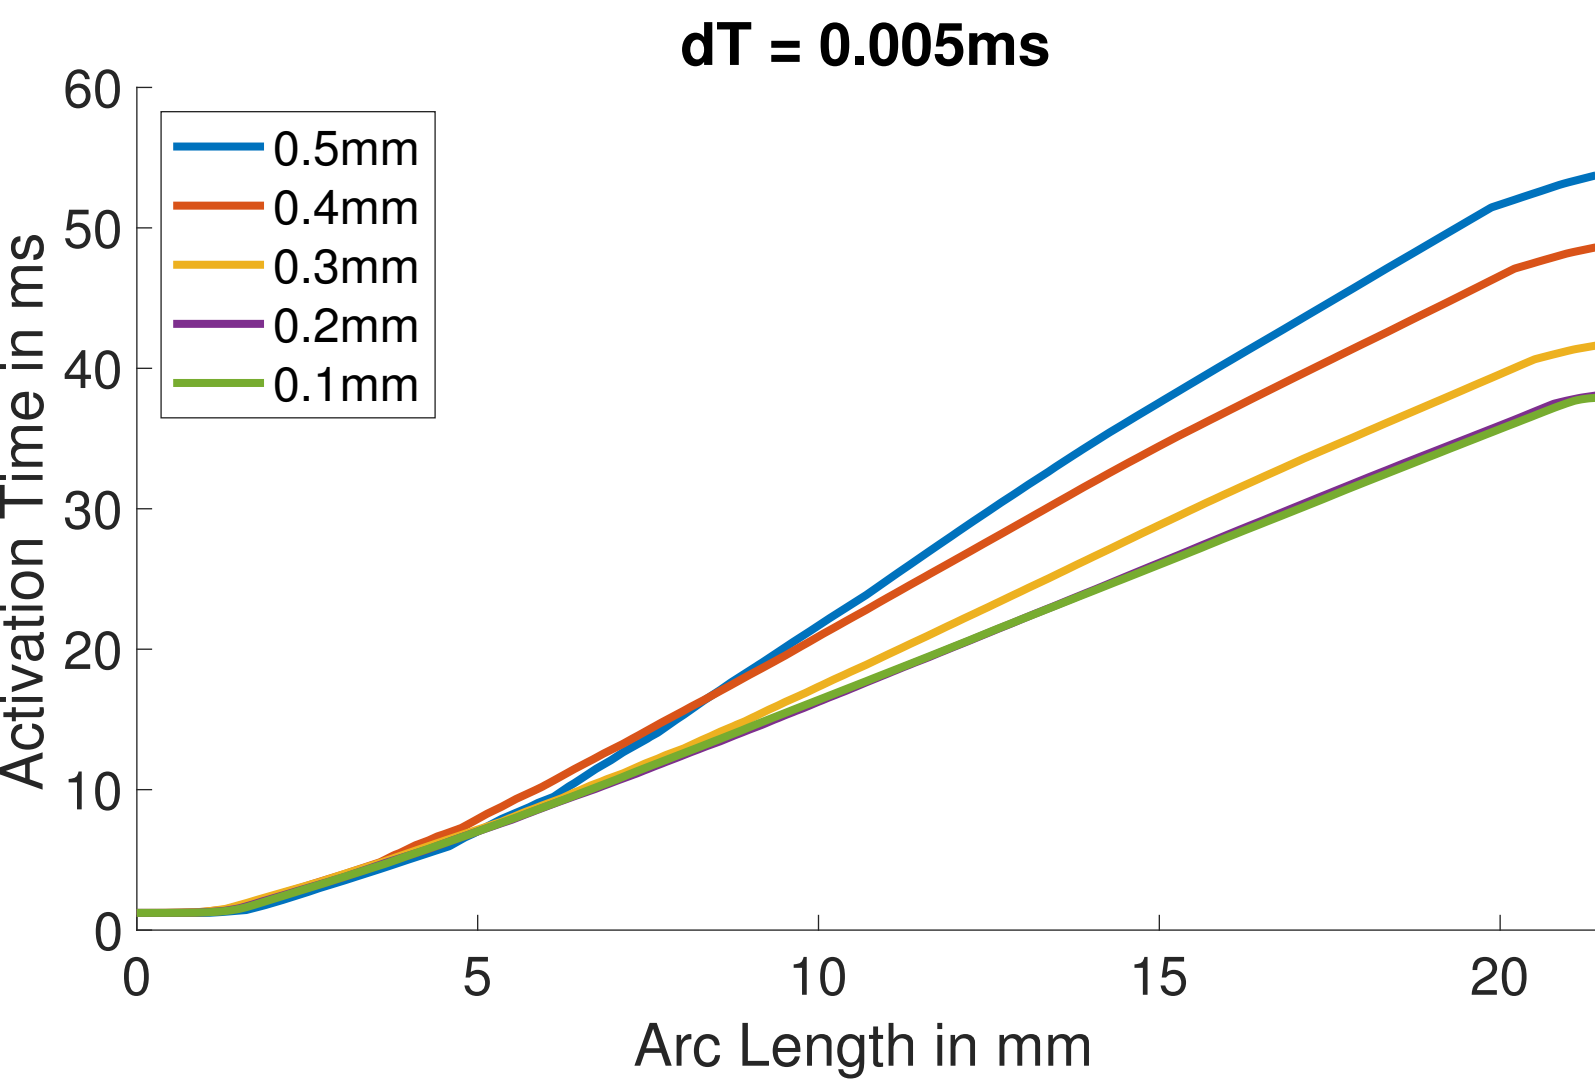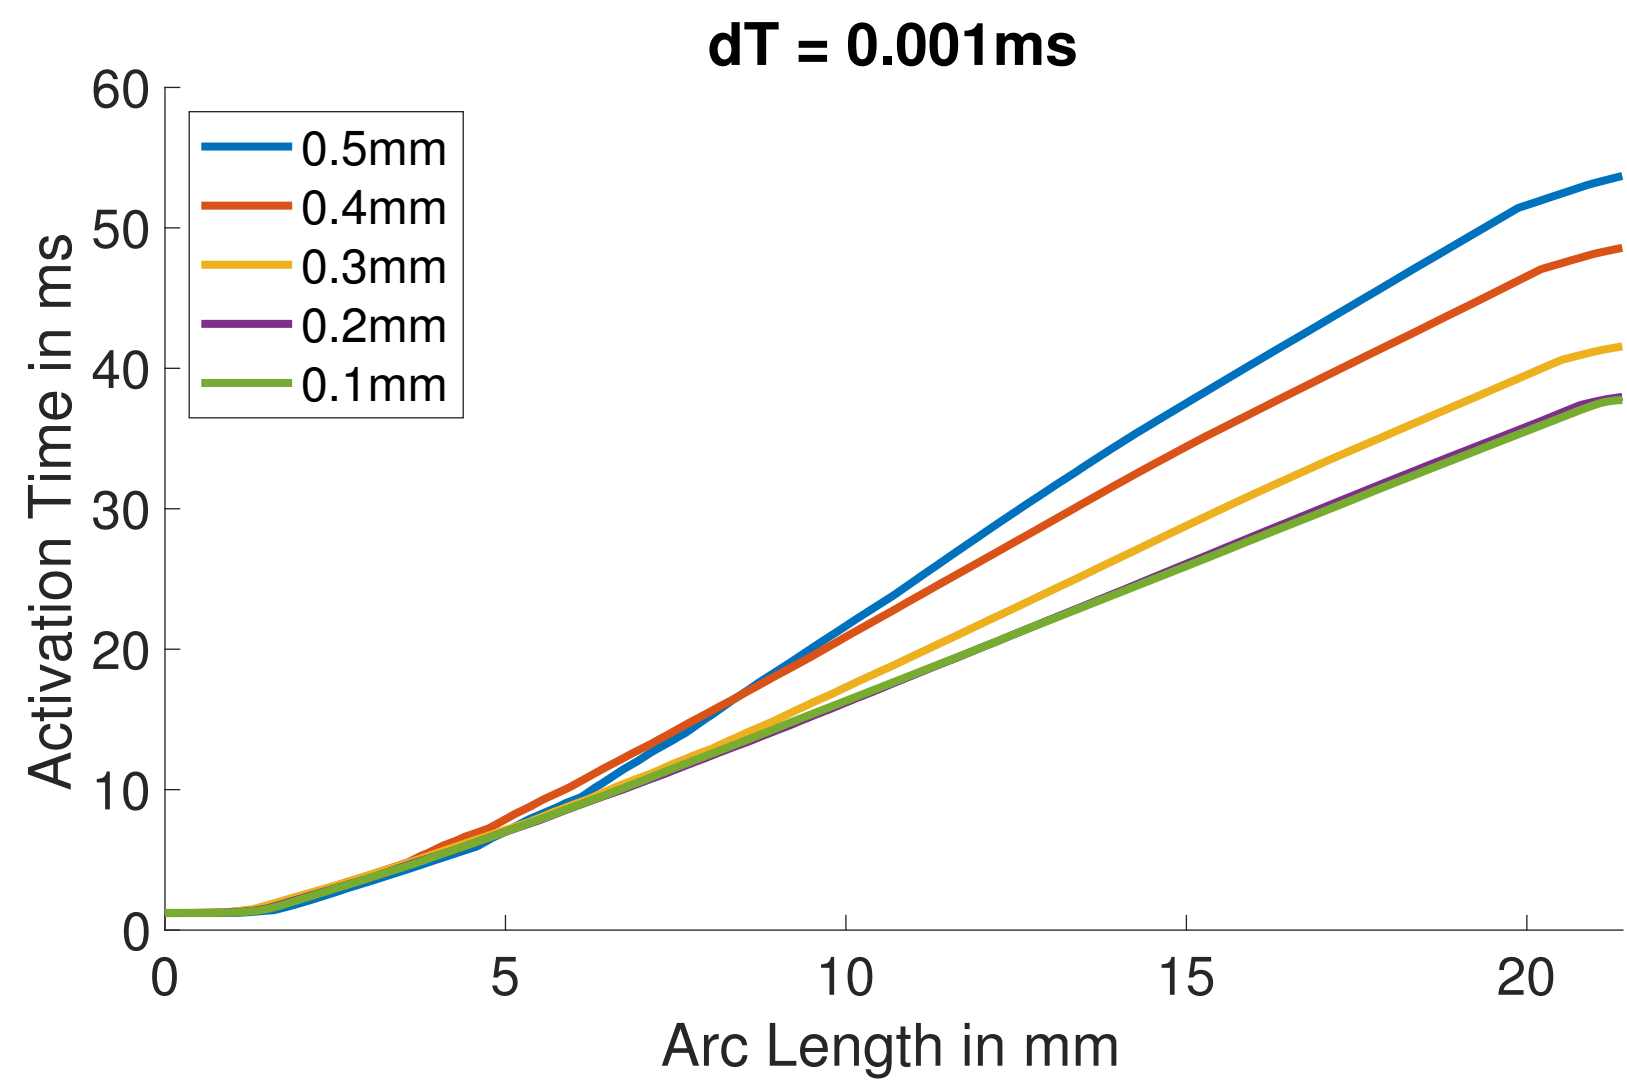

Supplement: s1 [file s1]

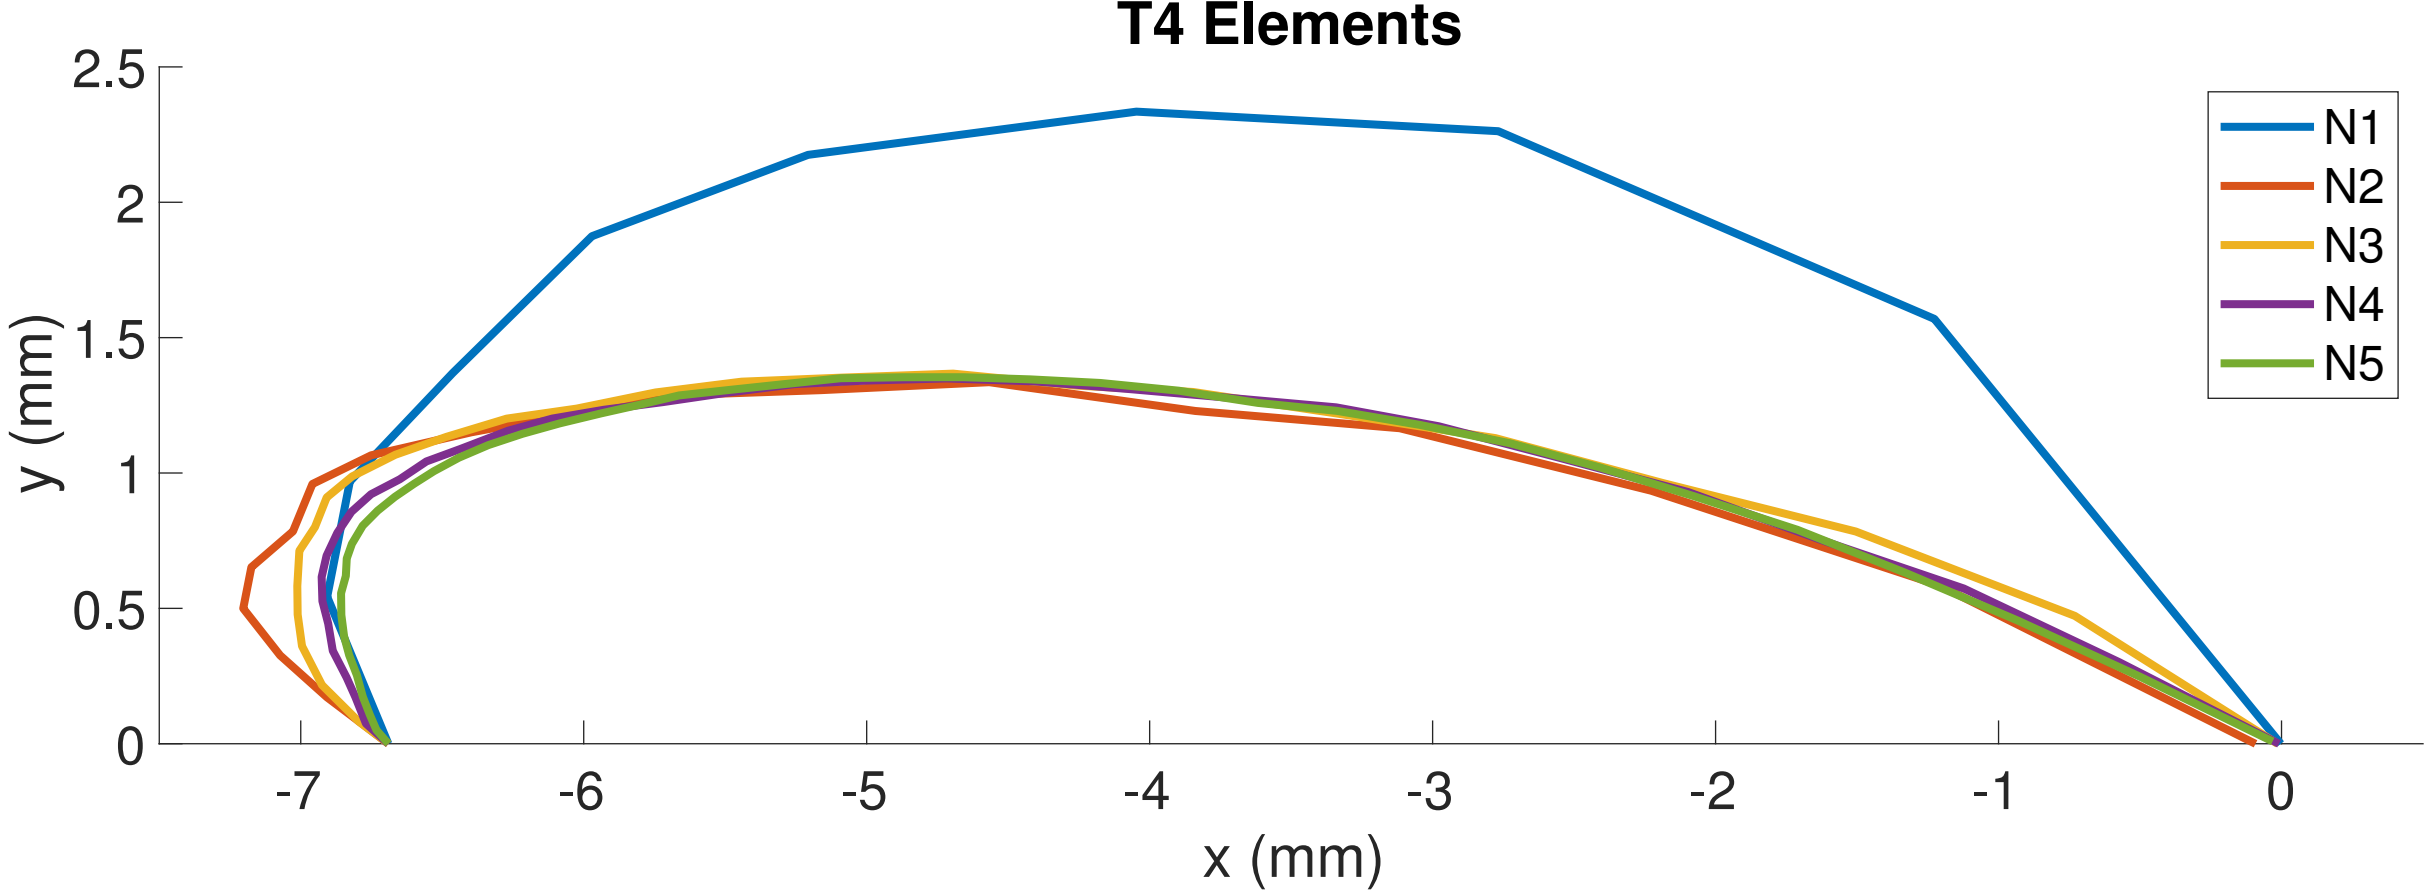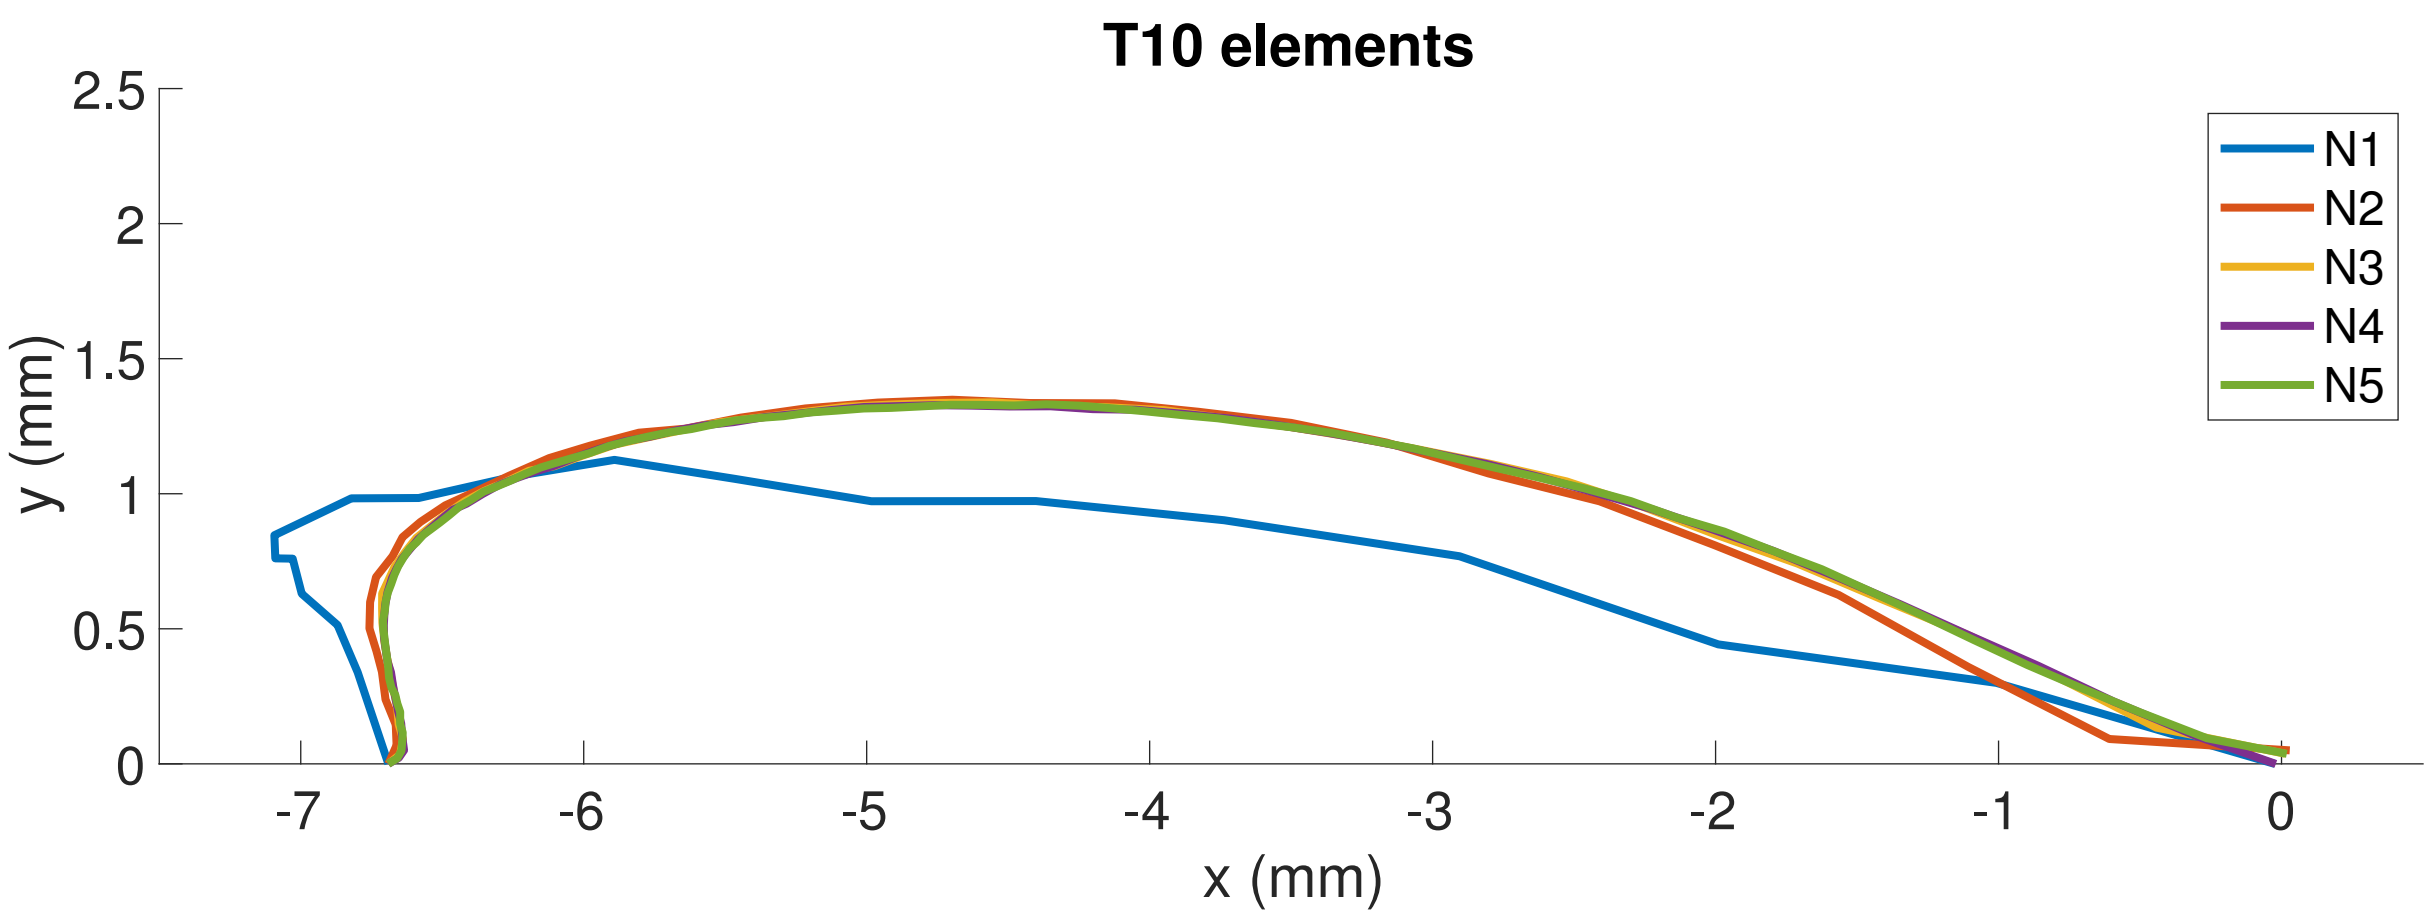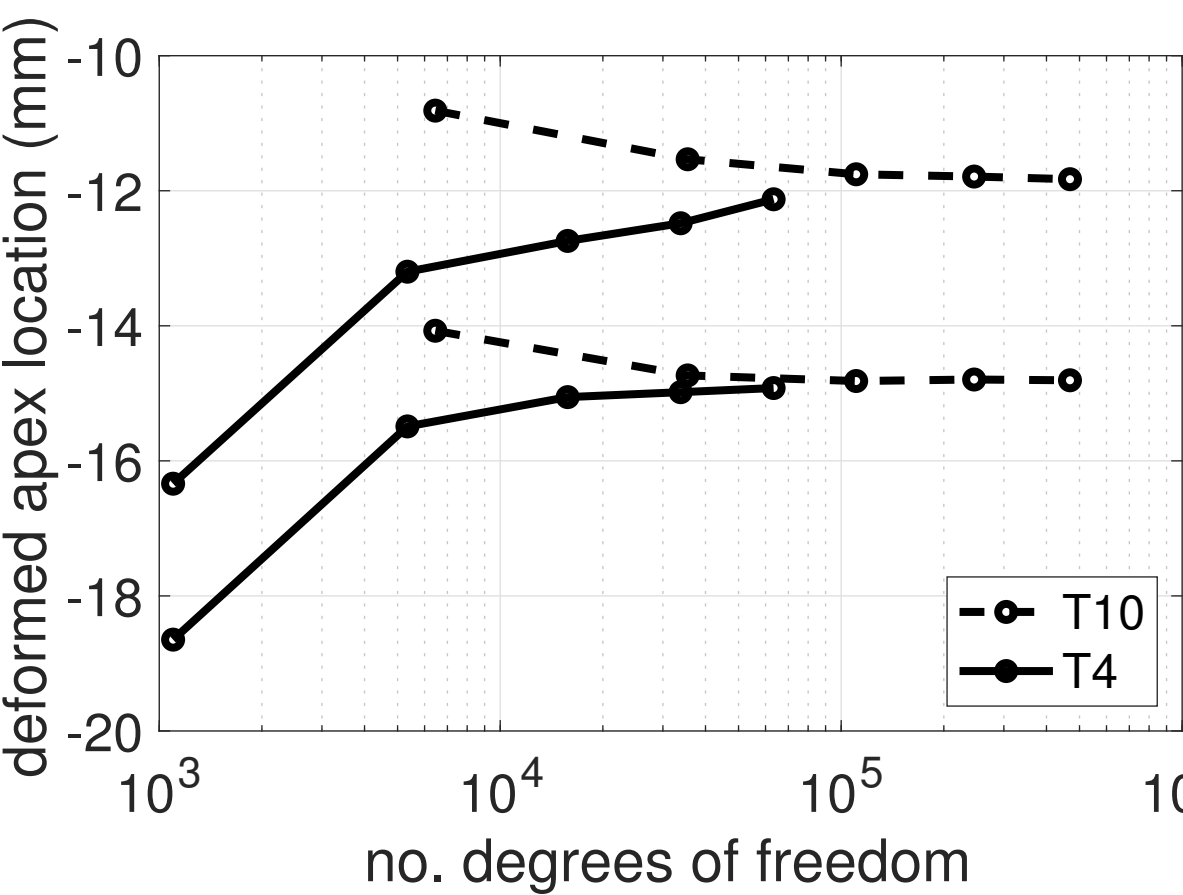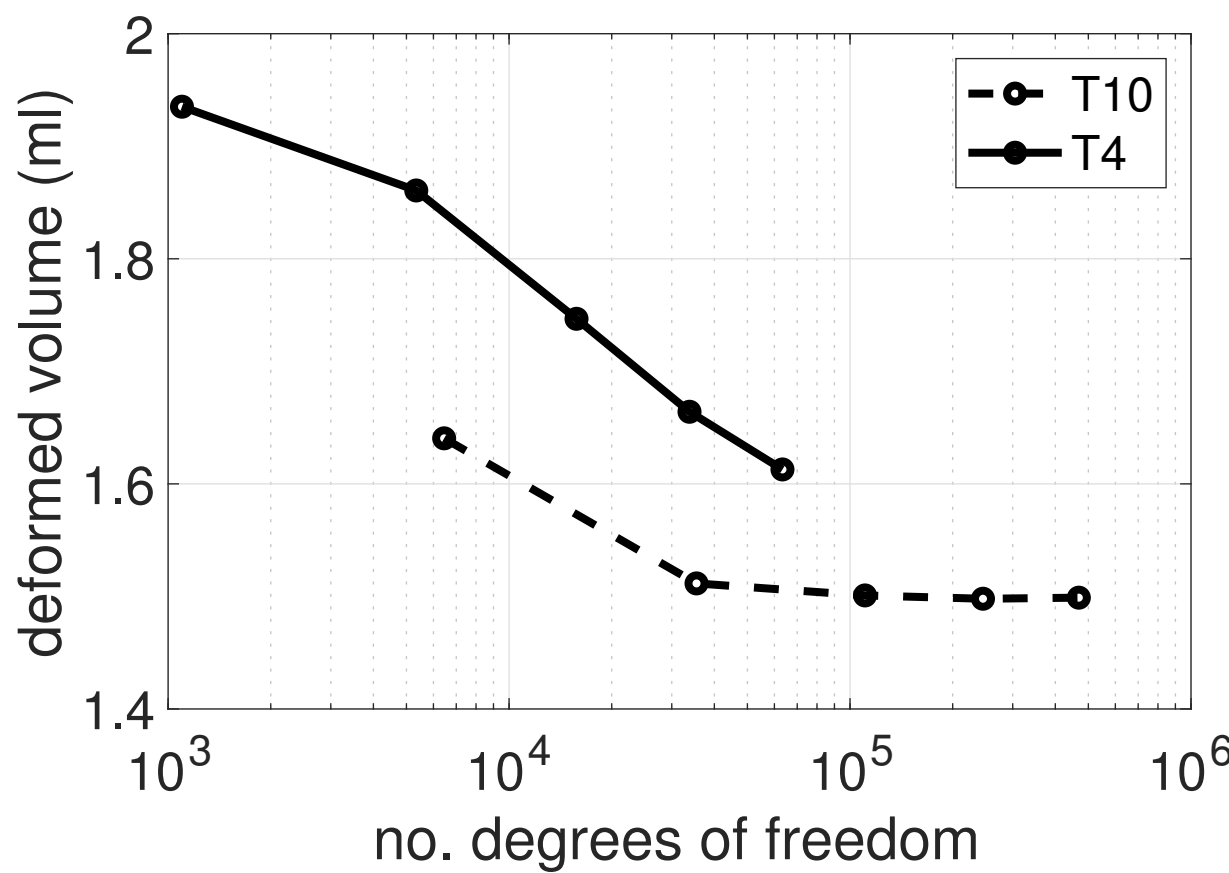

Supplement: s1 [file s1]

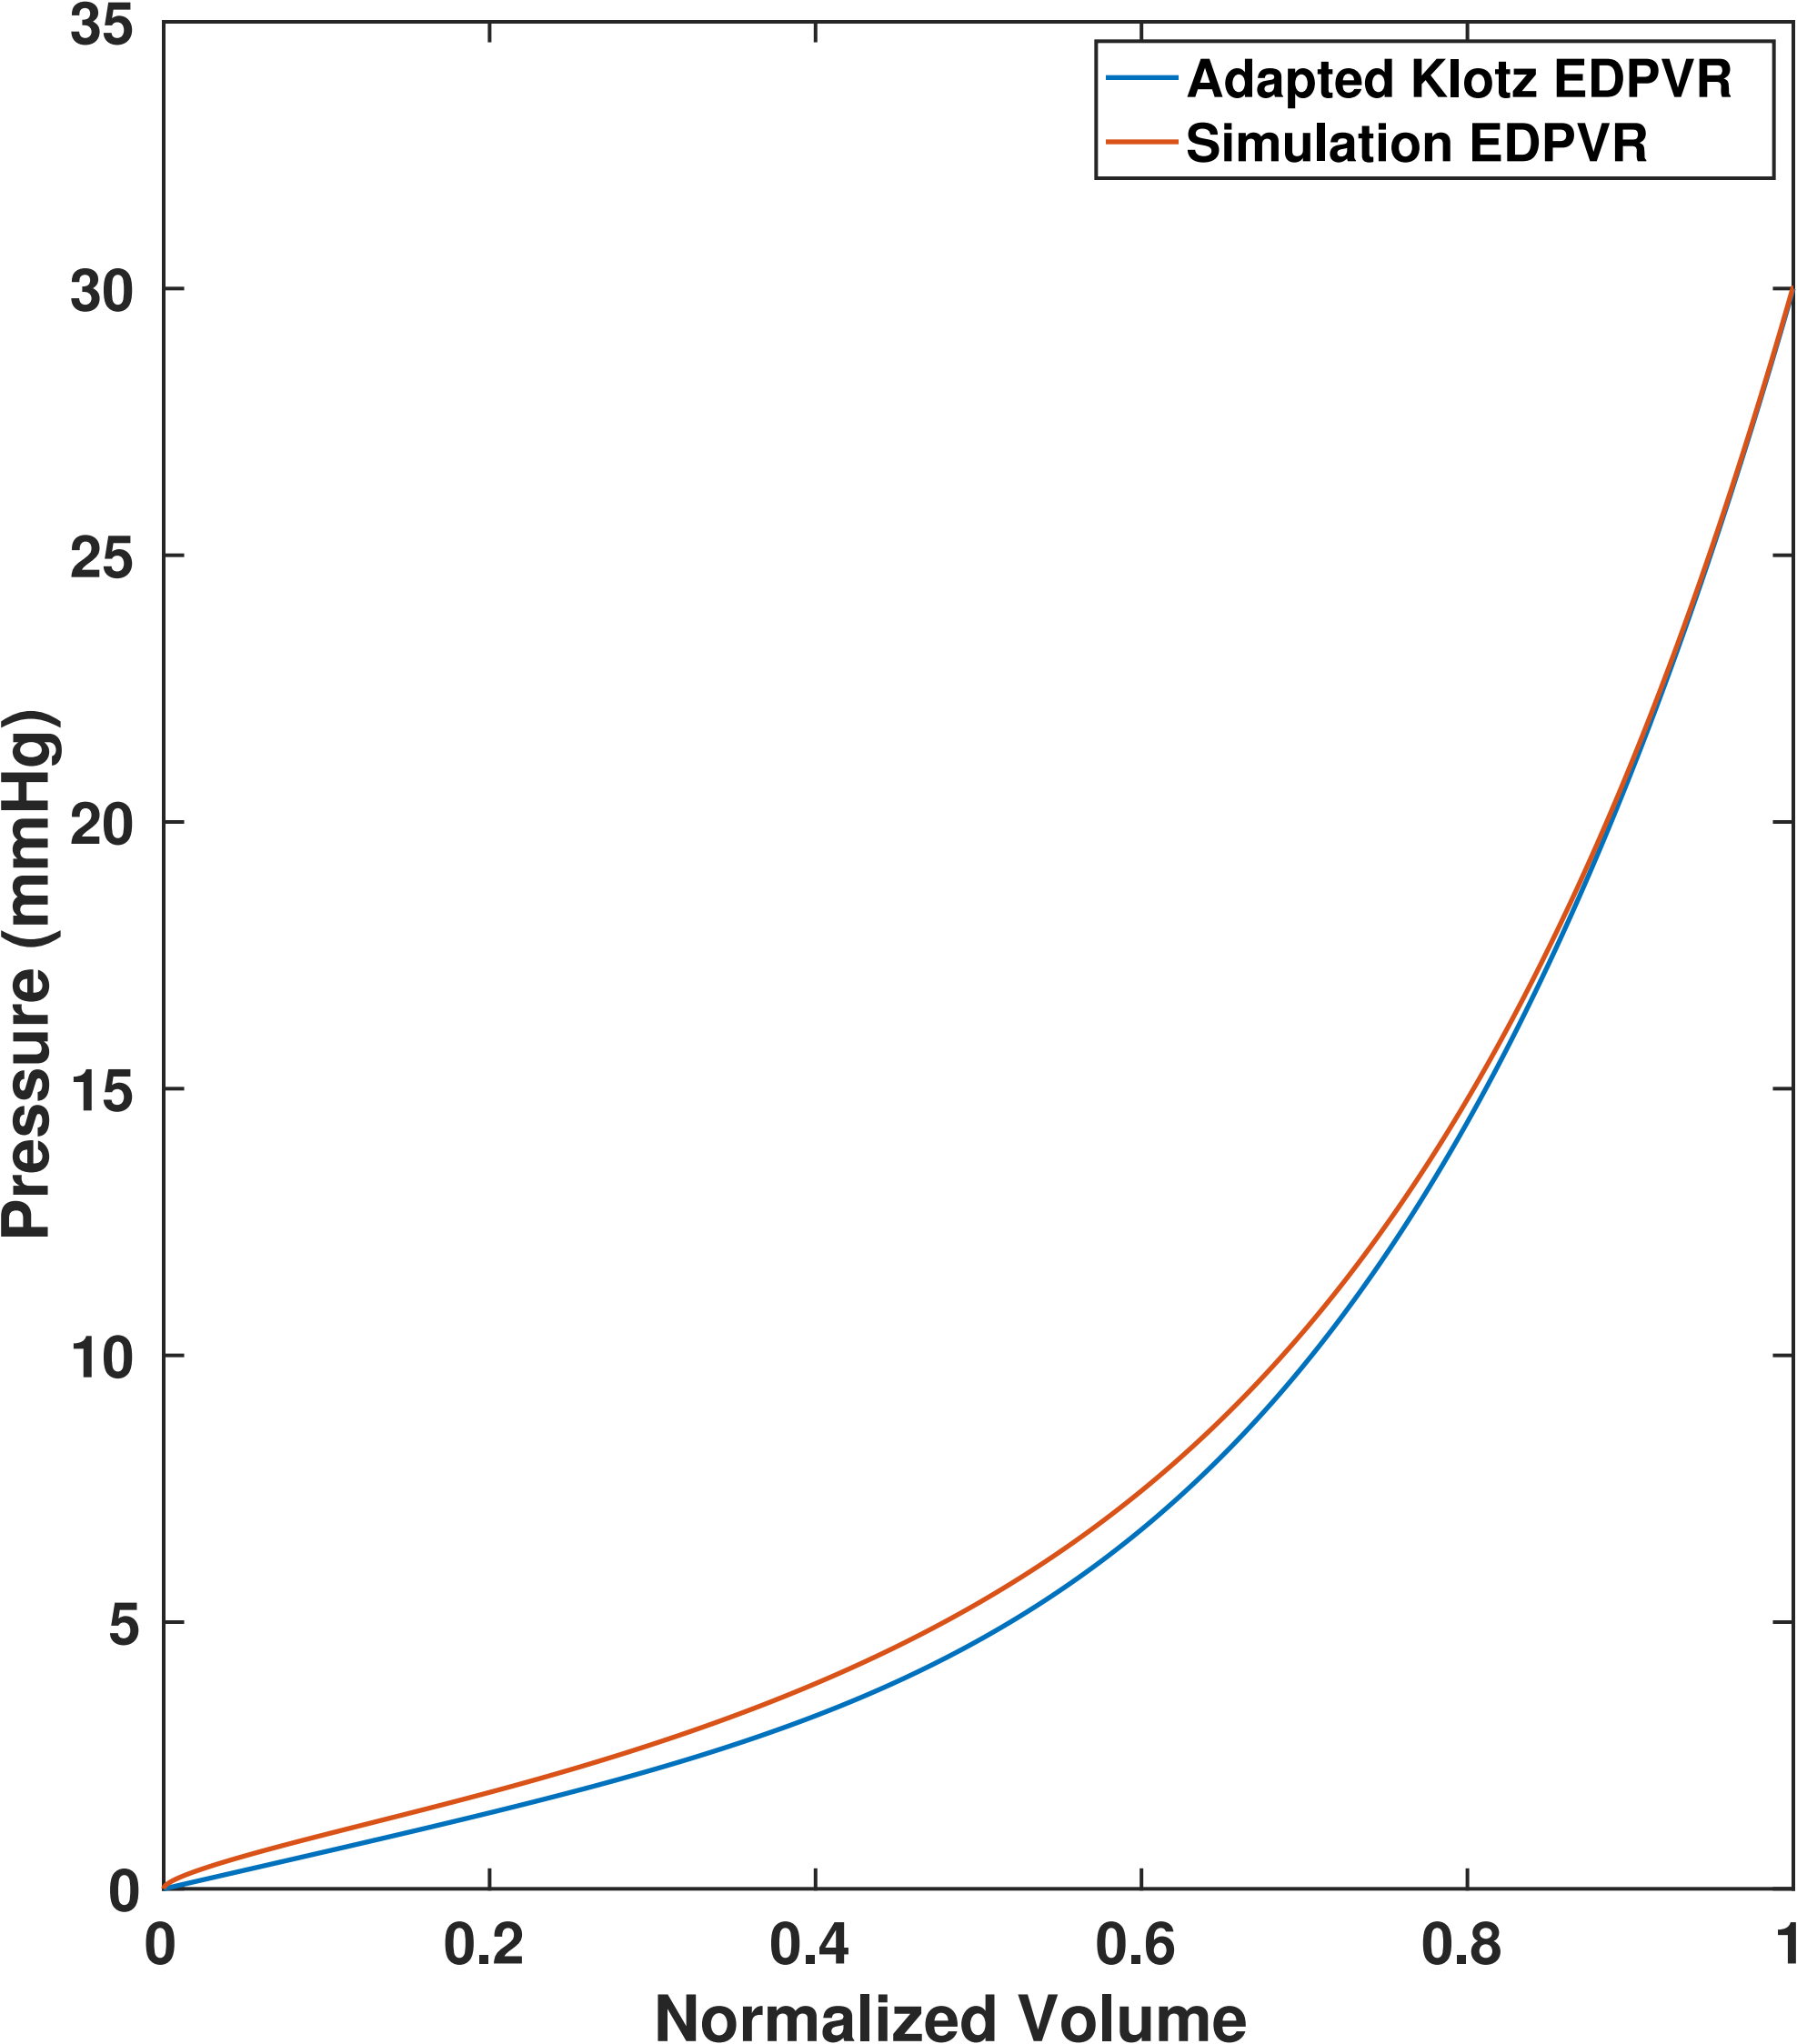

Supplement: s1 [file s1]

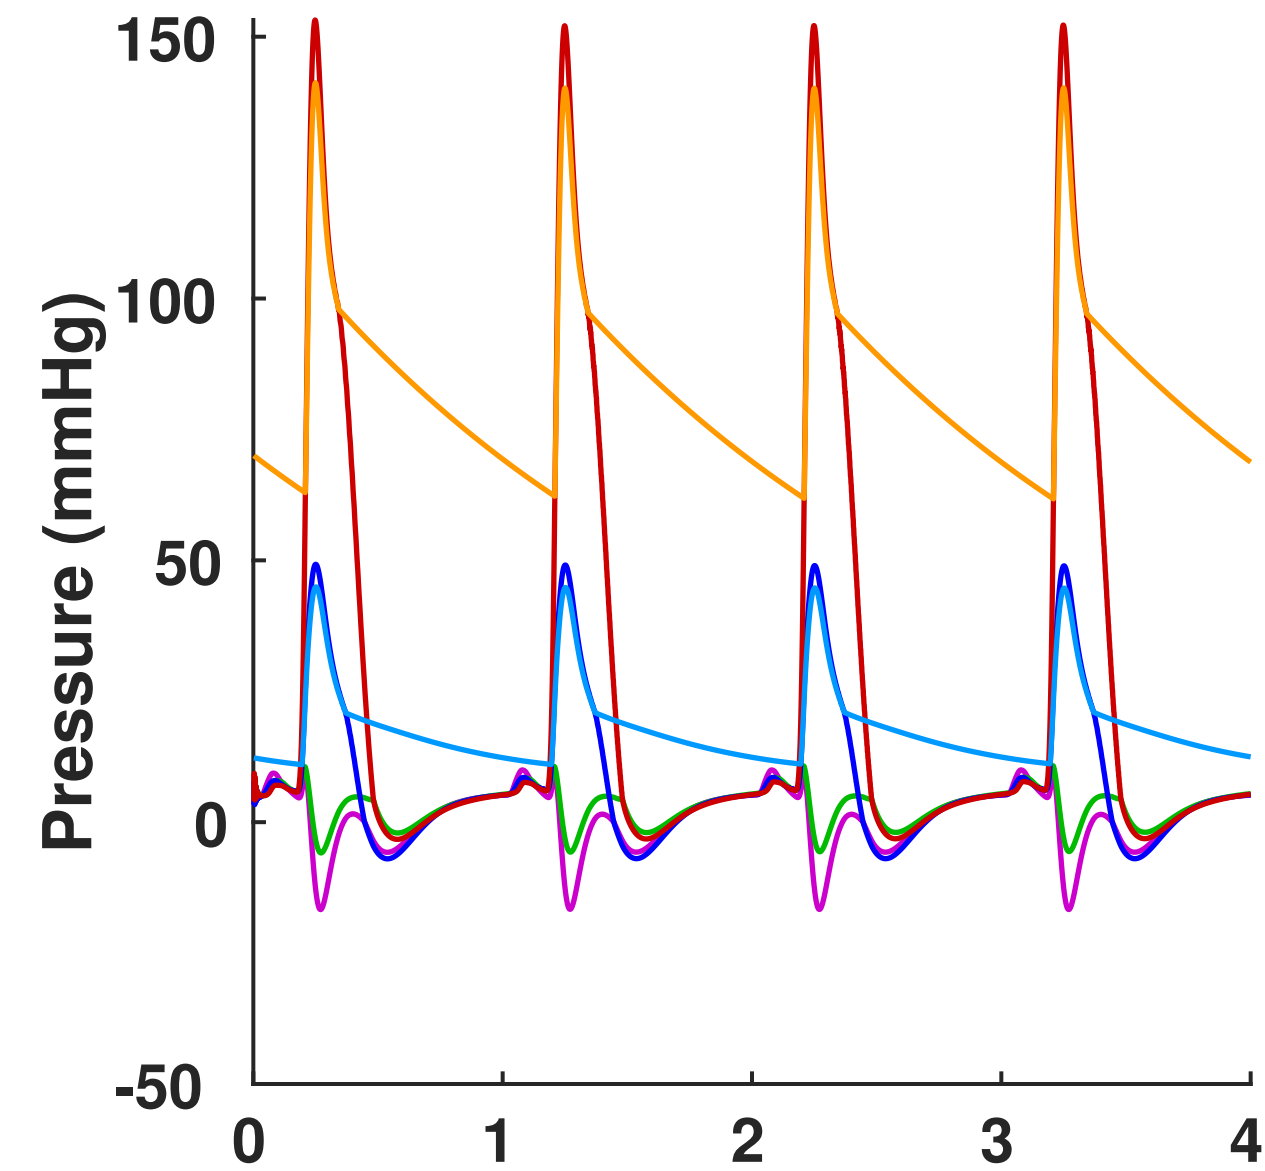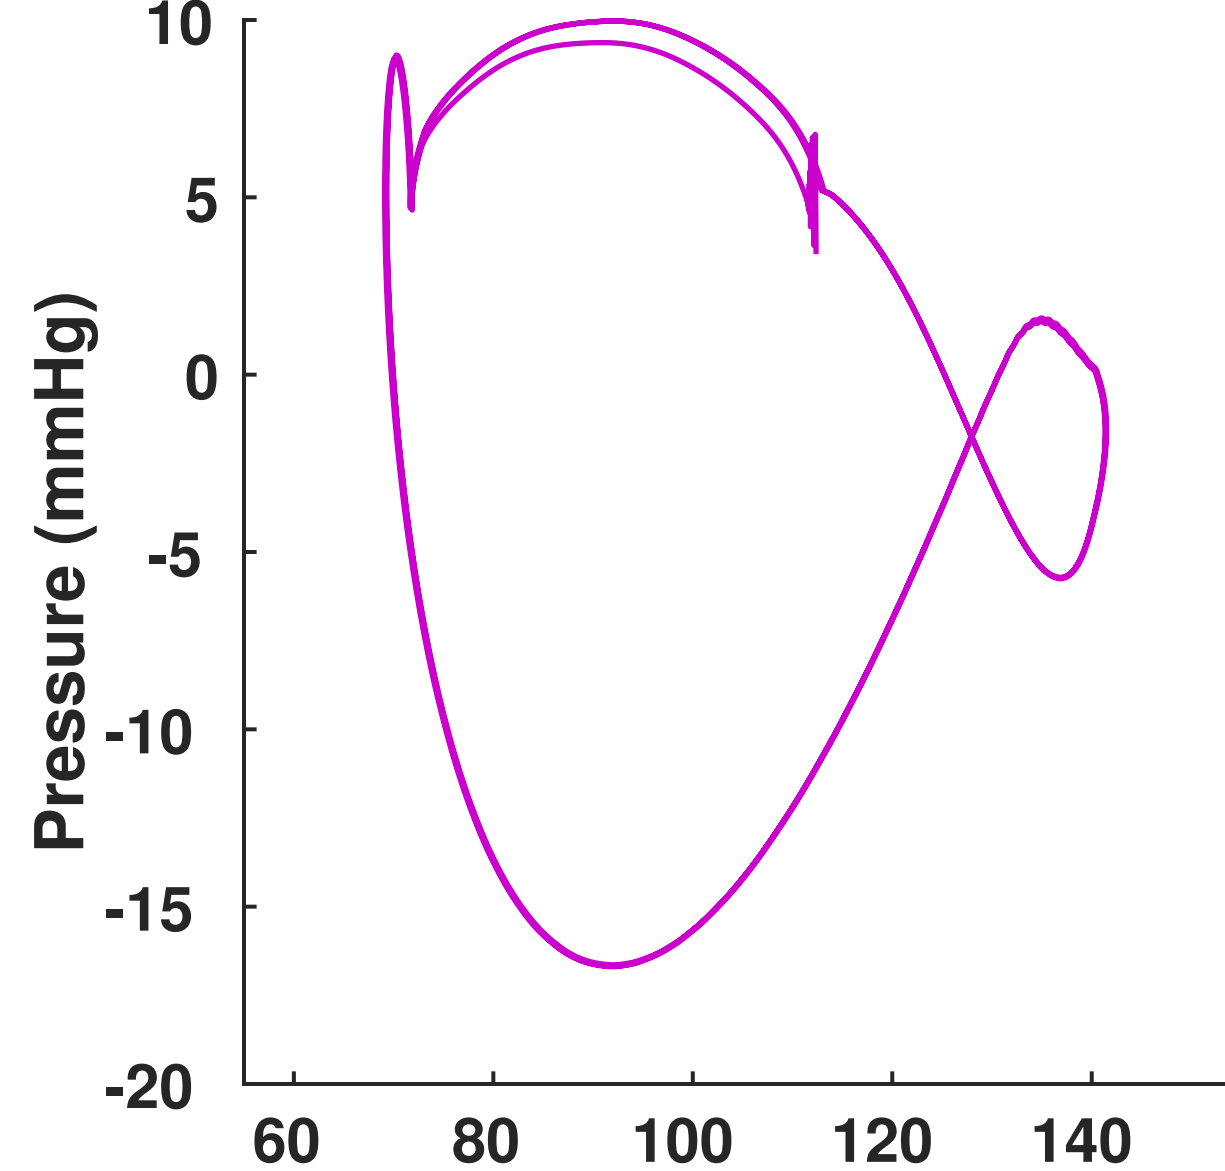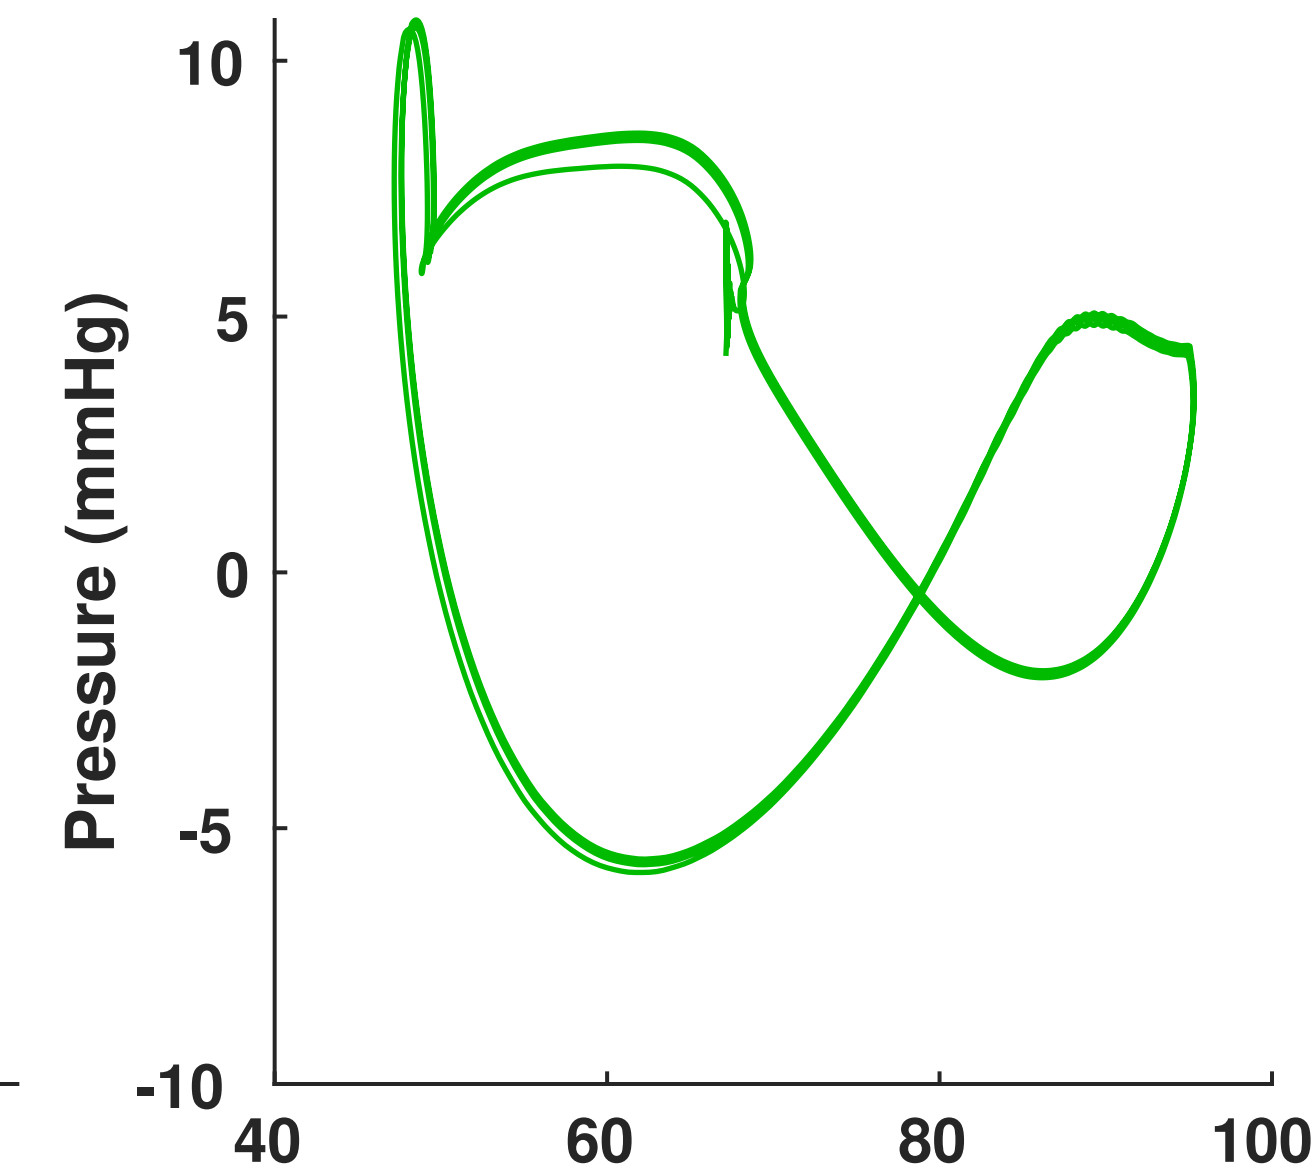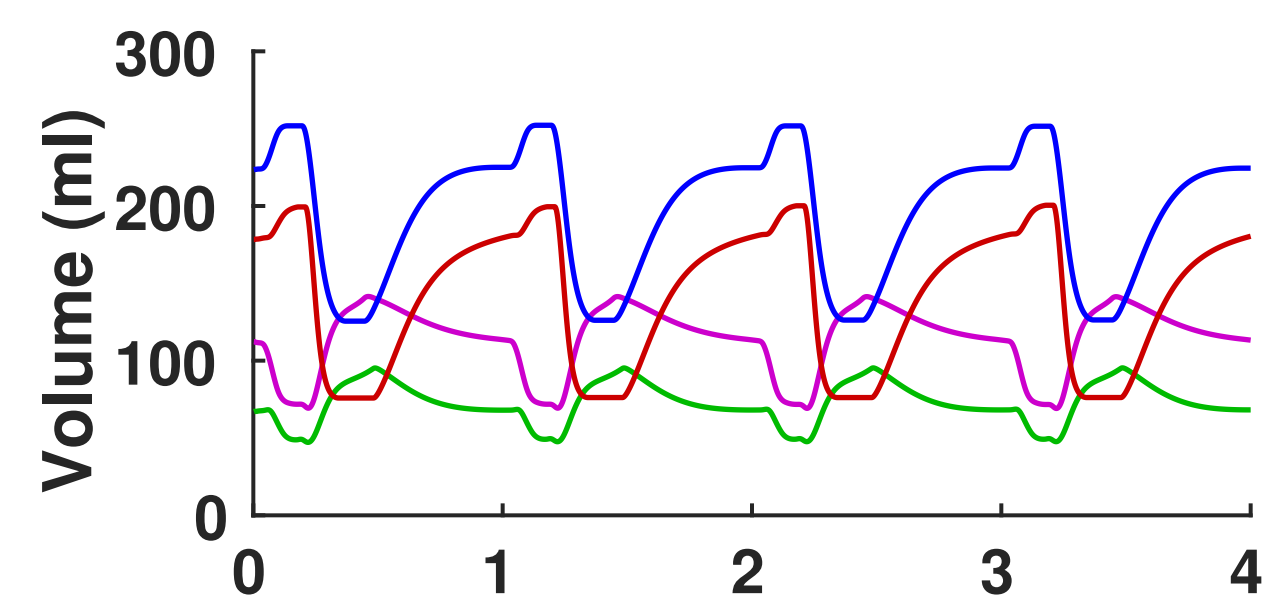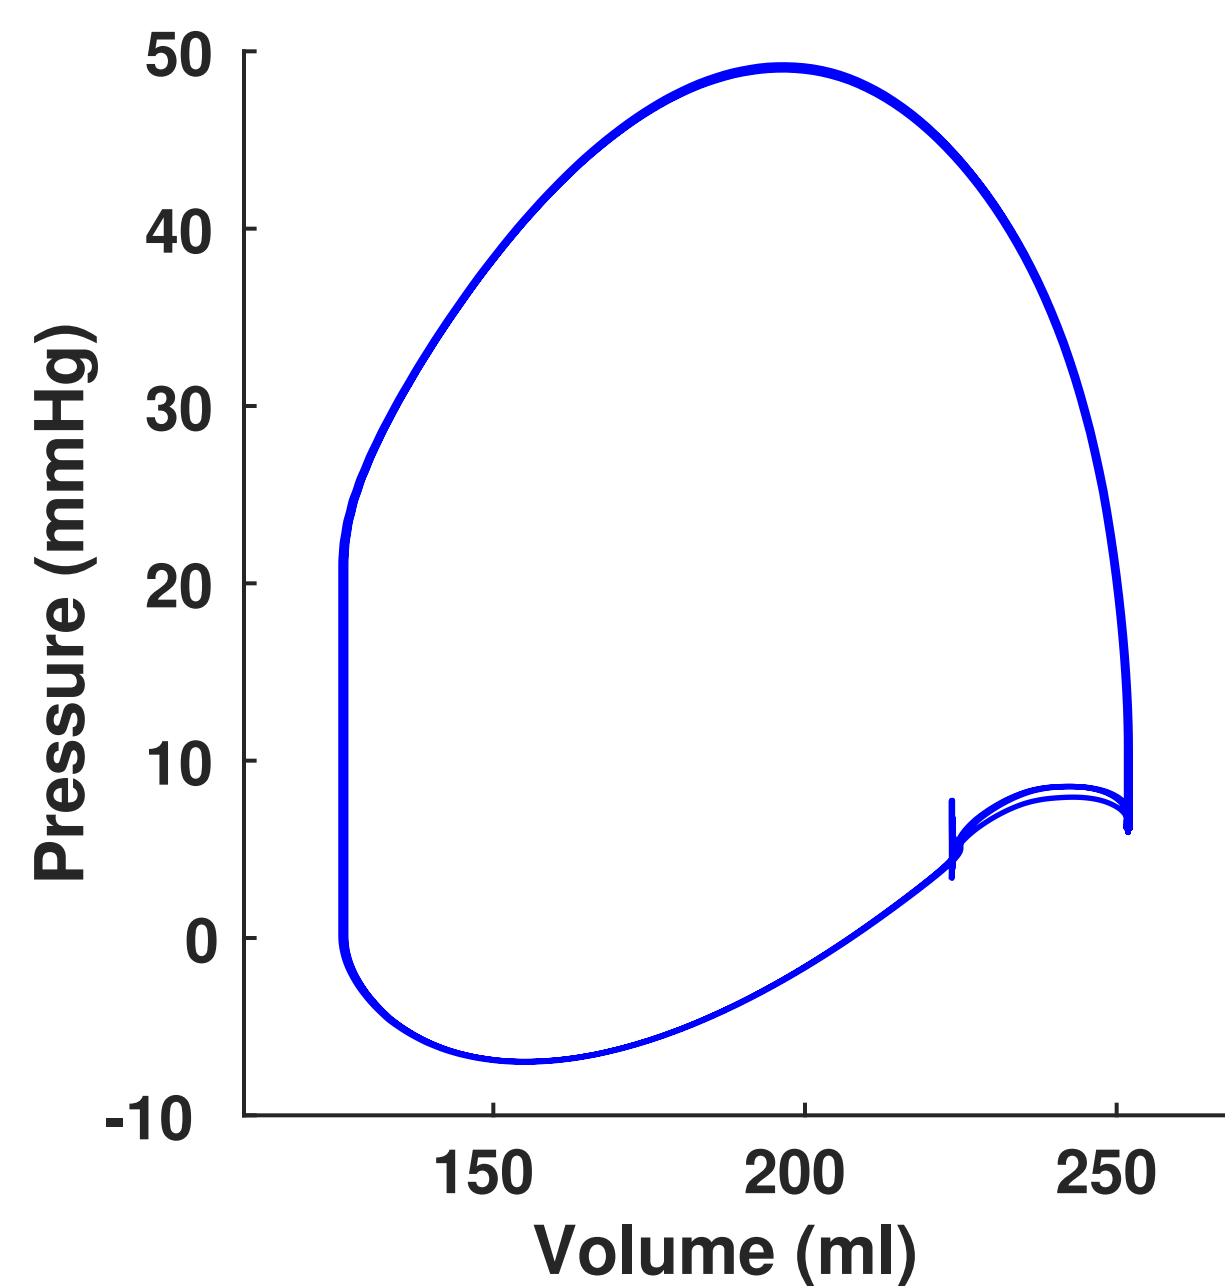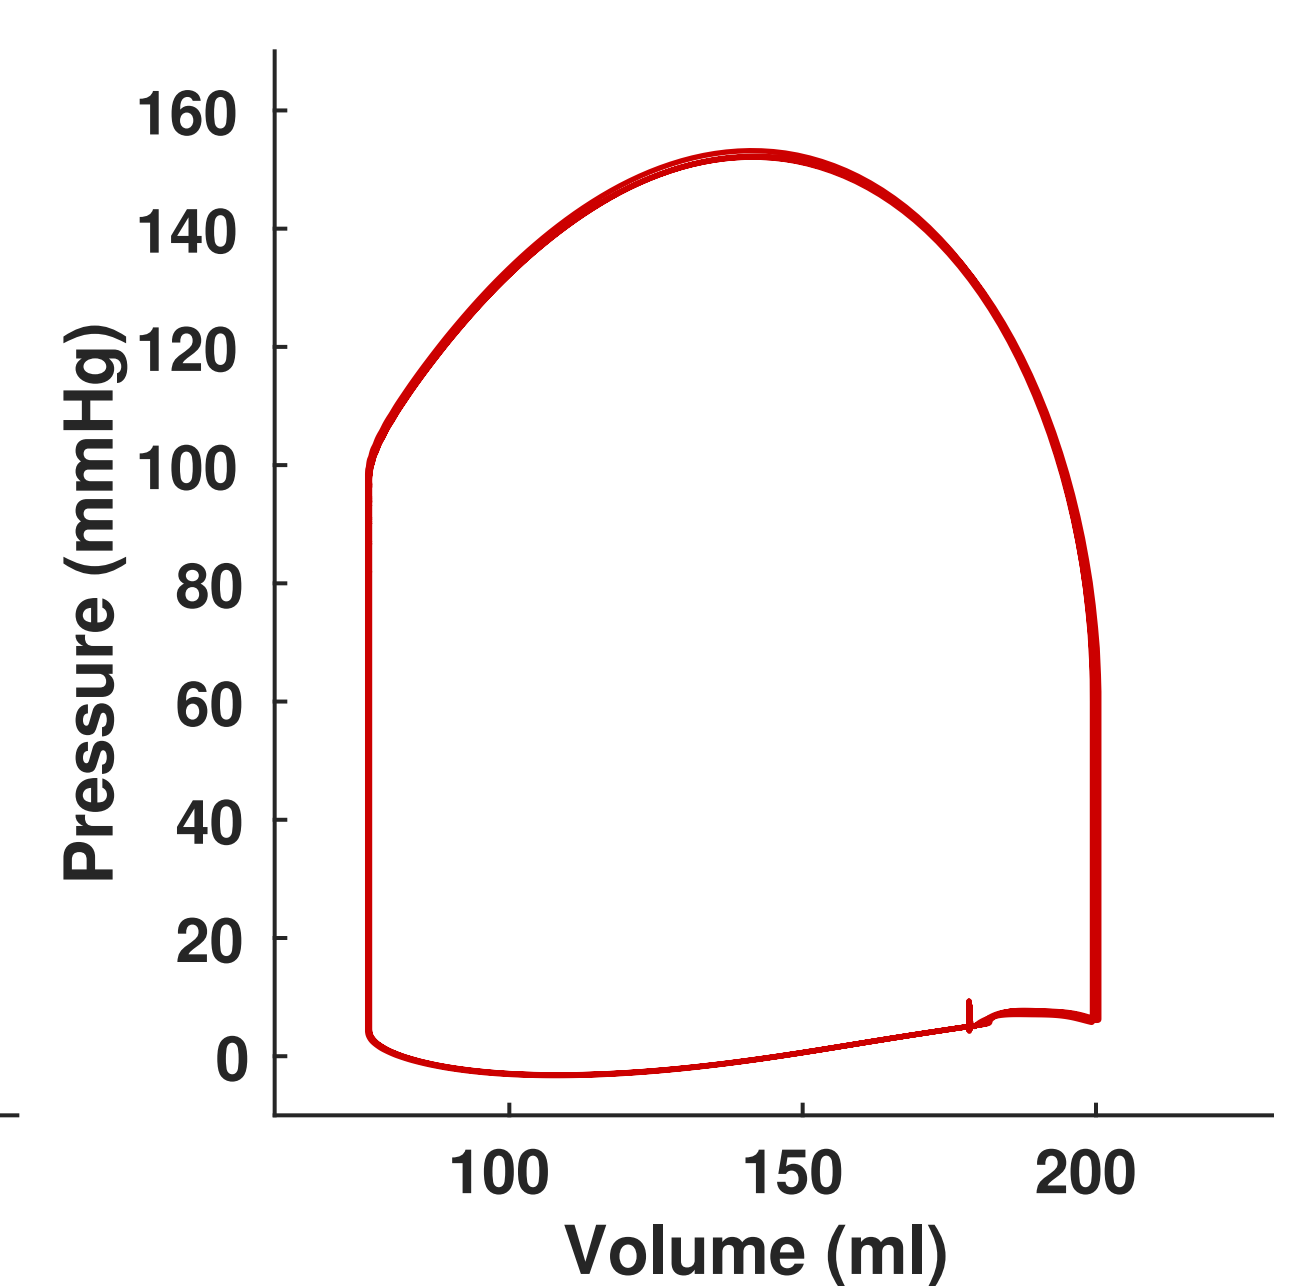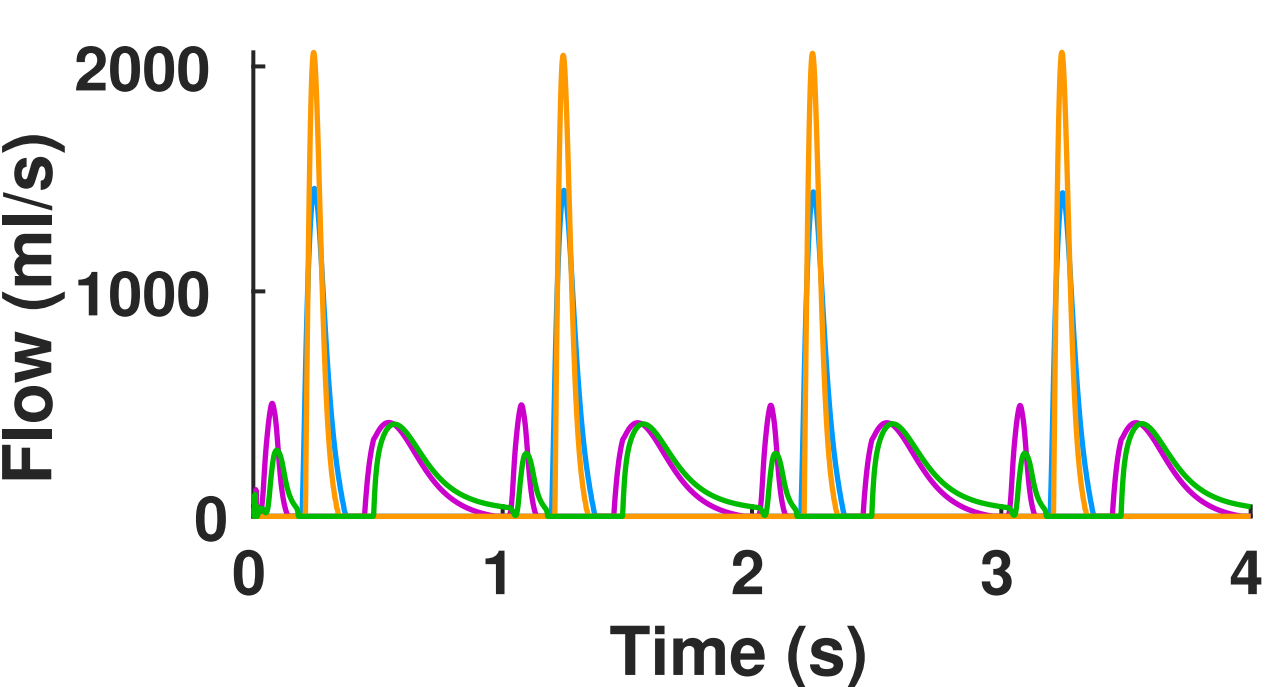

■ LV ■ SysArt ■ LA/LAV  
■ RV ■ PulArt ■ RA/RAV

Supplement: s1 [file s1]

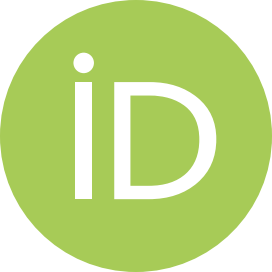

Supplement: s1 [file s1]
